# Supplementary material for: A zwitterionic 1D/2D polymer co-crystal and its polymorphic sub-components: a highly selective sensing platform for HIV ds-DNA sequences
Source: Royal Society of Chemistry journal article supplement (doi:10.1039/c5dt04410c), 2016-01-01
Supplement: c5dt04410c1.pdf [file c5dt04410c1.pdf]

## A zwitterionic 1D/2D polymer co-crystal and its polymorphic sub-components: a highly selective sensing platform for HIV ds-DNA sequences

Hai-Qing Zhao, Shui-Ping Yang, Ni-Ni Ding, Liang Qin, Gui-Hua Qiu, Jin-Xiang Chen, Wen-Hua Zhang, Wen-Hua Chen and T. S. Andy Hor

|                                                                                                                                                                                                                                                                              |   |
|------------------------------------------------------------------------------------------------------------------------------------------------------------------------------------------------------------------------------------------------------------------------------|---|
| <b>Table S1.</b> Selected bond distances (Å) and angles (°) for complexes 1-4.....                                                                                                                                                                                           | 2 |
| <b>Figure S1.</b> PXRD patterns of compounds 1-4 showing agreement between the simulated and as-synthesized for 1 (a), the simulated and immerse in H <sub>2</sub> O for 12 h for 2-4 (b-d) .....                                                                            | 3 |
| <b>Figure S2.</b> 2D network extended in the <i>ab</i> plane of [Na(dcbp)(H <sub>2</sub> O)] <sub>n</sub> (1). Color codes: Na (violet), O (red), N (blue), C (black).....                                                                                                   | 3 |
| <b>Figure S3.</b> Fluorescence quenching of the probe DNA (70 nM) incubated with Cu(NO <sub>3</sub> ) <sub>2</sub> of varying concentrations at room temperature. Inset: Plot of fluorescence intensity versus the concentrations of Cu(NO <sub>3</sub> ) <sub>2</sub> ..... | 4 |
| <b>Figure S4.</b> Fluorescent recovery of P-DNA@Cu(NO <sub>3</sub> ) <sub>2</sub> system after incubation with varying concentrations of target HIV ds-DNA at room temperature.....                                                                                          | 4 |
| <b>Figure S5.</b> Influence of incubation time between the P-DNA@3 system and the target ds-DNA on fluorescence intensity. Concentrations: target DNA, 20 nM; probe DNA, 70 nM; compound 3, 24.7 μM. The fluorescence intensity is collected at 518 nm.....                  | 5 |

**Table S1.** Selected bond distances (Å) and angles (°) for complexes **1–4**.

| <b>Complex 1</b>      |            |                       |            |
|-----------------------|------------|-----------------------|------------|
| Na(1)-O(4)            | 2.2522(15) | Na(1)-O(1)#1          | 2.2625(19) |
| Na(1)-O(3)#2          | 2.300(2)   | Na(1)-O(1W)           | 2.3095(15) |
| O(1)-C(7)             | 1.241(3)   | O(1)-Na(1)#3          | 2.2625(19) |
| O(2)-C(7)             | 1.257(3)   | O(3)-C(8)             | 1.250(3)   |
| O(3)-Na(1)#4          | 2.300(2)   | O(4)-Na(1)-O(1)#1     | 113.90(7)  |
| O(4)-Na(1)-O(3)#2     | 103.55(7)  | O(1)#1-Na(1)-O(3)#2   | 105.30(8)  |
| O(4)-Na(1)-O(1W)      | 125.27(7)  | O(1)#1-Na(1)-O(1W)    | 97.42(6)   |
| O(3)#2-Na(1)-O(1W)    | 110.09(6)  |                       |            |
| <b>Complex 2</b>      |            |                       |            |
| Cu(1)-O(1)            | 1.9497(19) | Cu(1)#5-O(1)          | 1.9497(19) |
| Cu(1)#6-N(2)          | 1.996(2)   | Cu(1)#7-N(2)          | 1.996(2)   |
| Cu(1)#8-N(2)          | 1.996(2)   |                       |            |
| O(1)#5-Cu(1)-O(1)     | 180.0      | O(1)#5-Cu(1)#6-N(2)   | 88.98(9)   |
| O(1)-Cu(1)#6-N(2)     | 91.02(9)   | O(1)#5-Cu(1)#7-N(2)   | 91.02(9)   |
| O(1)-Cu(1)#7-N(2)     | 88.98(9)   | N(2)#6-Cu(1)#7-N(2)   | 180.0(2)   |
| <b>Complex 3</b>      |            |                       |            |
| Cu(1)-O(1)            | 1.968(3)   | Cu(1)-O(5)            | 1.987(3)   |
| Cu(1)-N(2)#9          | 2.010(3)   | Cu(1)-N(4)#10         | 2.026(4)   |
| Cu(1)-O(3)#11         | 2.159(3)   | O(3)-Cu(1)#12         | 2.159(3)   |
| N(2)-Cu(1)#10         | 2.010(3)   | N(4)-Cu(1)#9          | 2.026(4)   |
| O(1)-Cu(1)-O(5)       | 176.12(13) | O(1)-Cu(1)-N(2)#9     | 91.11(14)  |
| O(5)-Cu(1)-N(2)#9     | 89.51(14)  | O(1)-Cu(1)-N(4)#10    | 90.37(14)  |
| O(5)-Cu(1)-N(4)#10    | 88.32(14)  | N(2)#9-Cu(1)-N(4)#10  | 169.33(15) |
| O(1)-Cu(1)-O(3)#11    | 90.84(12)  | O(5)-Cu(1)-O(3)#11    | 92.91(13)  |
| N(2)#9-Cu(1)-O(3)#11  | 95.60(14)  | N(4)#10-Cu(1)-O(3)#11 | 94.95(14)  |
| <b>Complex 4</b>      |            |                       |            |
| Cu(1)-N(2)            | 2.012(3)   | Cu(1)-N(3)            | 2.002(3)   |
| Cu(1)#13-O(7)         | 1.964(2)   | Cu(1)#14-O(1)         | 2.005(3)   |
| Cu(1)#15-O(6)         | 2.155(2)   | Cu(1)-O(1)#16         | 2.005(3)   |
| Cu(1)-O(6)#17         | 2.155(2)   | Cu(1)-O(7)#14         | 1.964(2)   |
| Cu(2)-N(7)            | 2.025(3)   | Cu(2)-N(6)            | 2.027(3)   |
| Cu(2)-O(1W)           | 2.187(5)   |                       |            |
| O(7)#13-Cu(1)-N(3)    | 91.66(11)  | O(7)-Cu(1)-O(1)#14    | 177.73(11) |
| N(3)-Cu(1)#14-O(1)    | 89.44(11)  | O(7)#13-Cu(1)-N(2)    | 90.02(11)  |
| N(3)-Cu(1)-N(2)       | 170.53(12) | O(1)#14-Cu(1)-N(2)    | 88.57(11)  |
| O(7)#13-Cu(1)-O(6)#15 | 89.21(10)  | N(3)-Cu(1)#15-O(6)    | 94.17(10)  |
| O(1)#14-Cu(1)-O(6)#15 | 92.70(10)  | N(2)-Cu(1)#15-O(6)    | 95.18(11)  |
| N(7)-Cu(2)-N(6)       | 164.51(17) | N(7)-Cu(2)-O(1W)      | 100.17(16) |
| N(6)-Cu(2)-O(1W)      | 94.79(17)  |                       |            |

Symmetry transformations used to generate equivalent atoms: #1:  $-x, y - 1/2, -z + 1/2$ ; #2:  $-x + 1, y - 1/2, -z + 1/2$ ; #3:  $-x, y + 1/2, -z + 1/2$ ; #4:  $-x + 1, y + 1/2, -z + 1/2$ ; #5:  $-x + 2, -y, -z$ ; #6:  $-x + 1, -y, -z + 1$ ; #7:  $x + 1, y, z - 1$ ; #8:  $x - 1, y, z + 1$ ; #9:  $x, y, z + 1$ ; #10:  $x, y, z - 1$ ; #11:  $x - 1, y, z$ ; #12:  $x + 1, y, z$ ; #13:  $x, y + 1, z$ ; #14:  $x, y - 1, z$ ; #15:  $x - 1, y + 1, z$ ; #16:  $x, y + 1, z$ ; #17:  $x + 1, y - 1, z$ .

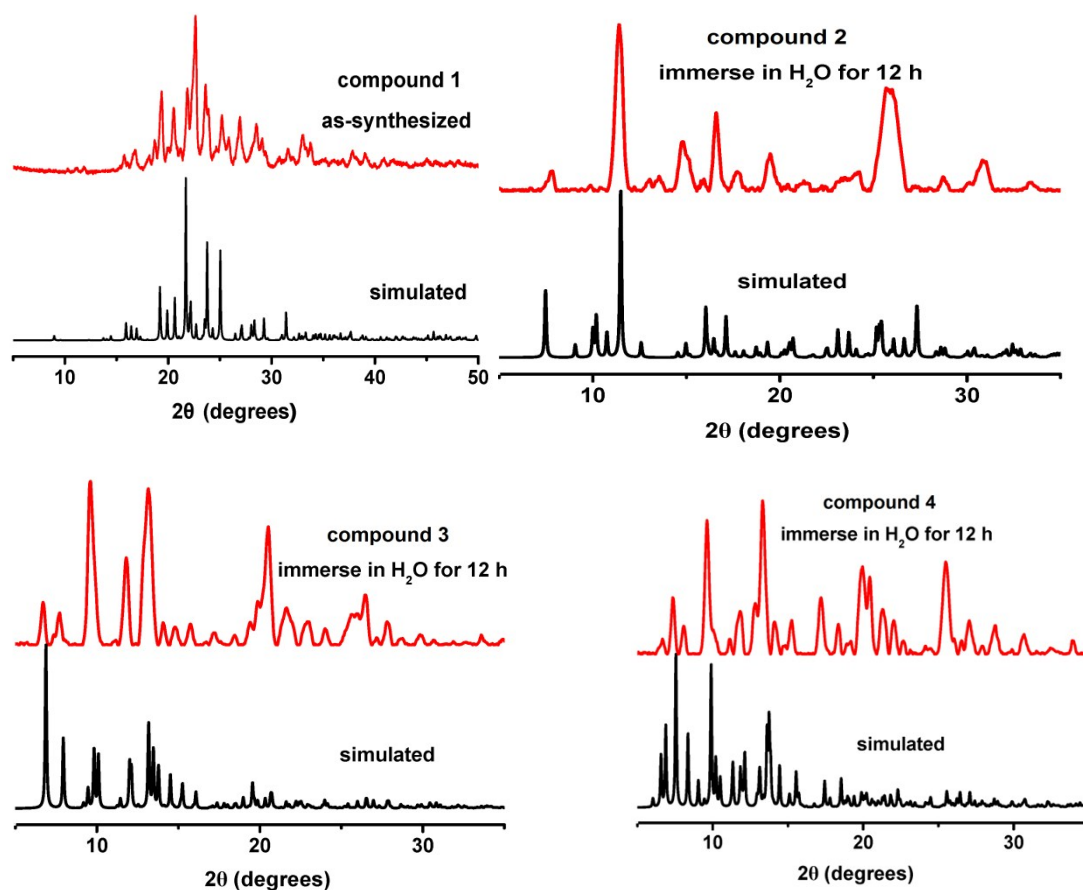

**Figure S1.** PXRD patterns of compounds 1–4 showing agreement between the simulated and as-synthesized for 1 (a), the simulated and immerse in H<sub>2</sub>O for 12 h for 2–4 (b–d)

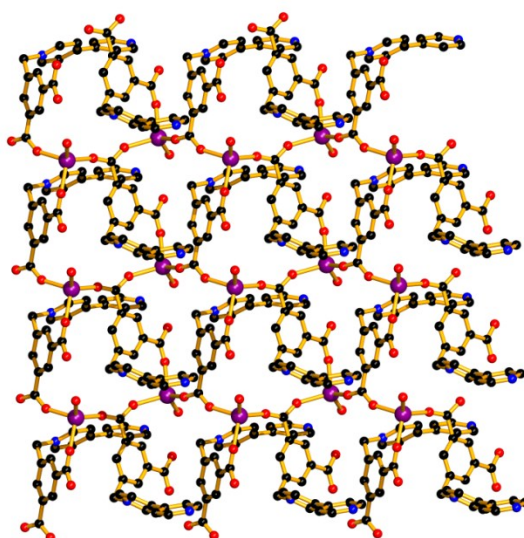

**Figure S2.** 2D network of [Na(dcbp)(H<sub>2</sub>O)]<sub>n</sub> (1) extended in the *ab* plane. Color codes: Na (violet), O (red), N (blue), C (black).

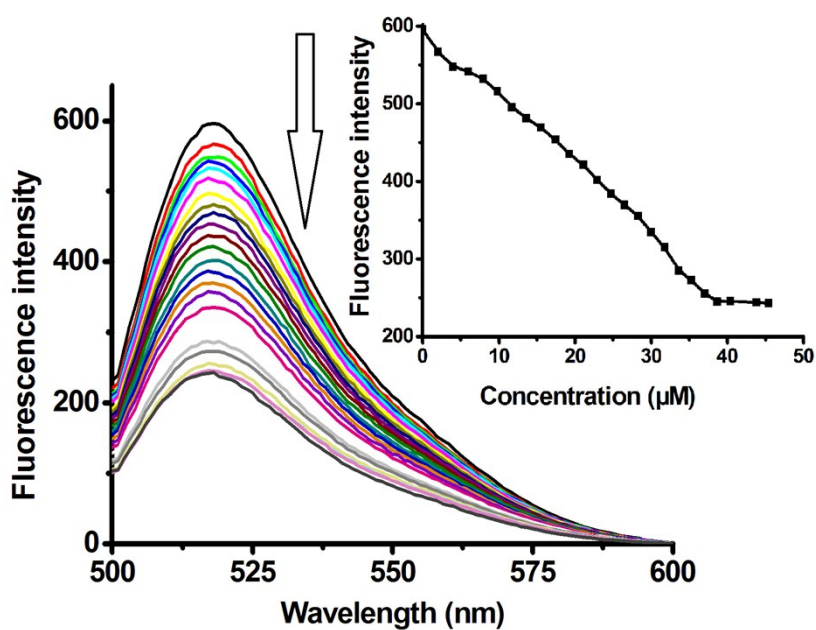

**Figure S3.** Fluorescence quenching of the probe DNA (70 nM) incubated with  $\text{Cu}(\text{NO}_3)_2$  of varying concentrations at room temperature. Inset: Plot of fluorescence intensity versus the concentrations of  $\text{Cu}(\text{NO}_3)_2$ .

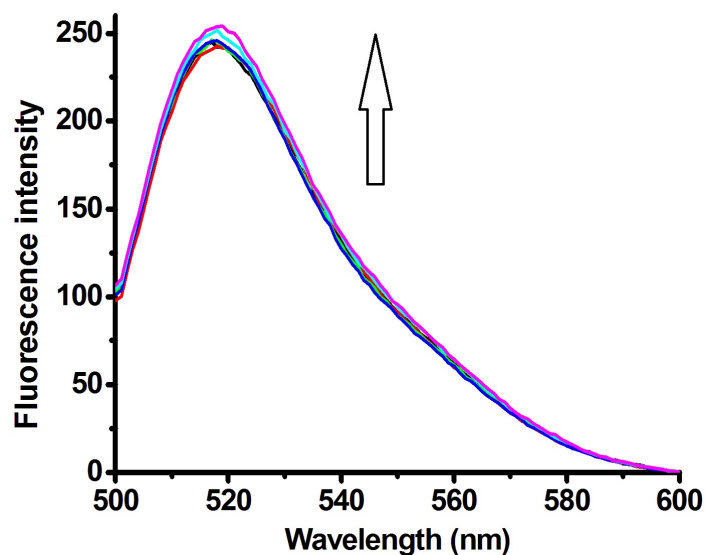

**Figure S4.** Fluorescent recovery of P-DNA@ $\text{Cu}(\text{NO}_3)_2$  system after incubation with varying concentrations of target HIV ds-DNA at room temperature.

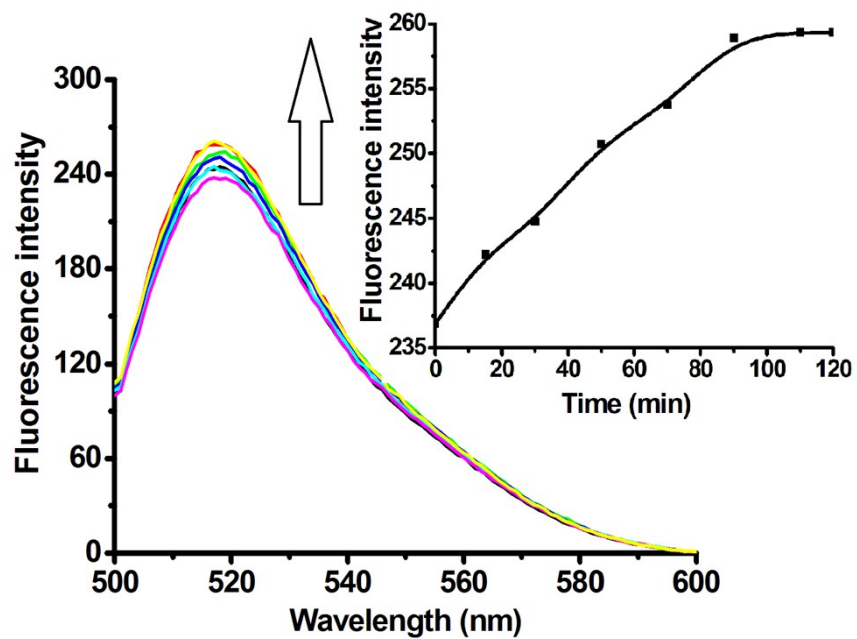

**Figure S5.** Influence of incubation time between the P-DNA@**3** system and the target ds-DNA on fluorescence intensity. Concentrations: target DNA, 20 nM; probe DNA, 70 nM; compound **3**, 24.7  $\mu$ M. The fluorescence intensity is collected at 518 nm.
